# Supplementary material for: Distinct brain pathologies associated with Alzheimer’s disease biomarker-related phospho-tau 181 and phospho-tau 217 in App knock-in mouse models of amyloid-β amyloidosis
Source: PubMed Central journal article supplement (PMC9683396; doi:10.1093/braincomms/fcac286), 2022-11-06
Supplement: fcac286_supplementary_data.pdf [file fcac286_supplementary_data.pdf]

# Supplementary data

## **Distinct brain pathologies associated with Alzheimer's disease biomarker-related phospho-tau 181 and phospho-tau 217 in *App* knock-in mouse models of A $\beta$ amyloidosis**

Yu Hirota<sup>1, 2</sup>, Yasufumi Sakakibara<sup>1</sup>, Kyoko Ibaraki<sup>1</sup>, Kimi Takei<sup>1</sup>, Koichi M. Iijima<sup>1, 3, \*</sup>, Michiko Sekiya<sup>1, 3, \*</sup>

<sup>1</sup>Department of Neurogenetics, Center for Development of Advanced Medicine for Dementia, National Center for Geriatrics and Gerontology, Obu, Aichi, Japan 474-8511

<sup>2</sup>Research Fellow of Japan Society for the Promotion of Science, Chiyoda-ku, Tokyo, Japan 102-0083

<sup>3</sup>Department of Experimental Gerontology, Graduate School of Pharmaceutical Sciences, Nagoya City University, Nagoya, Japan 467-8603

\*Corresponding authors

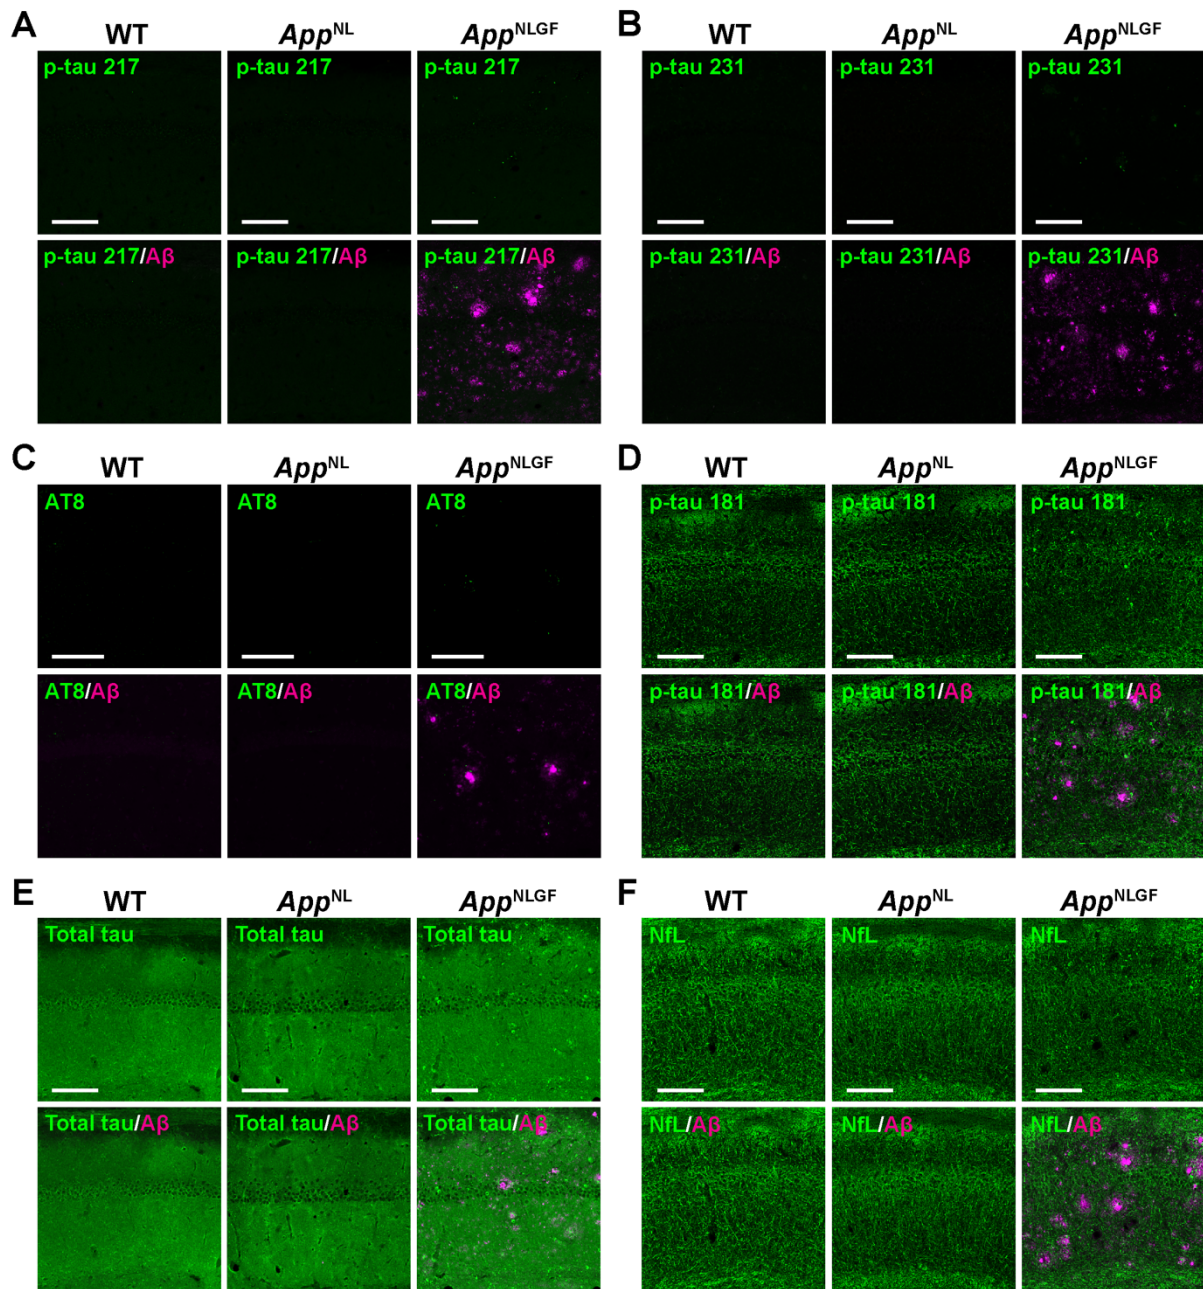

**Supplementary Figure 1. Presence of p-tau 217, 231, 202/205/208 (AT8) and 181 around Aβ plaques in CA1.**

Representative images of the CA1 region of the hippocampus from frozen coronal brain sections immunostained with antibodies against (A) p-tau 217, (B) p-tau 231, (C) p-tau 202/205/208 (AT8), (D) p-tau 181, (E) total tau, and (F) NfL (each in green) in combination with an antibody against Aβ (in magenta). Scale bars, 100 μm.

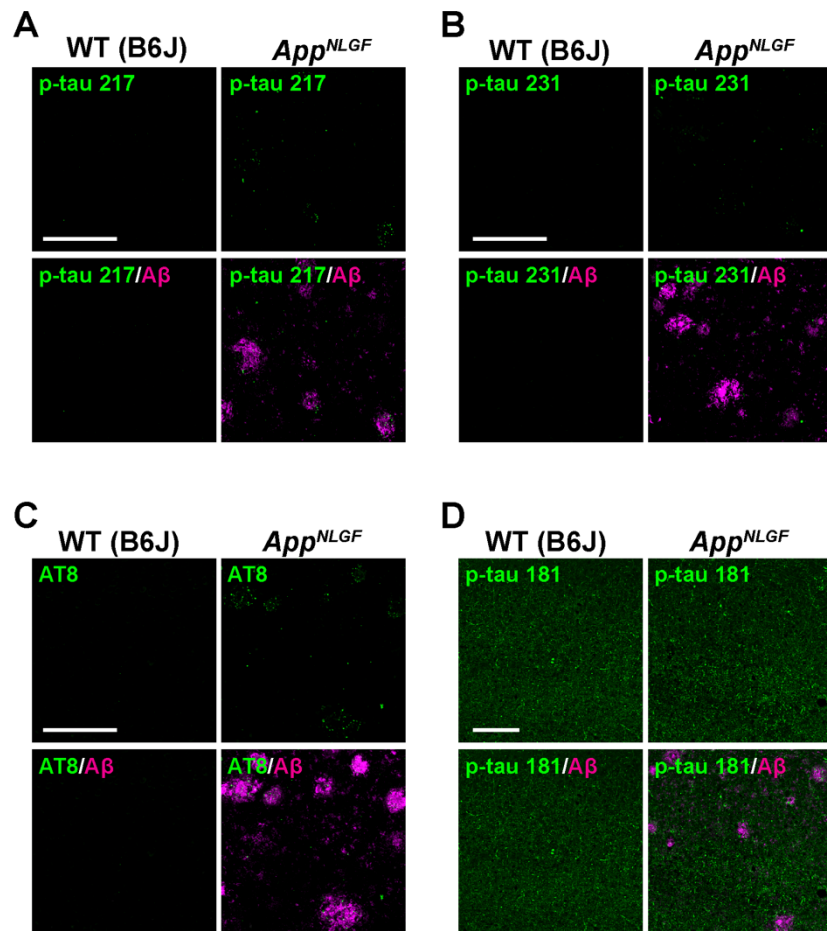

**Supplementary Figure 2. Presence of p-tau 217, 231, 202/205/208 (AT8) and 181 around Aβ plaques in *App<sup>NLGF</sup>* female mice.**

Representative images of cortices from frozen coronal brain sections of female mice immunostained with antibodies against (A) p-tau 217, (B) p-tau 231, (C) p-tau 202/205/208 (AT8) and (D) p-tau 181 (each indicated by green) in combination with an antibody against Aβ (magenta). Scale bars, 100 μm.

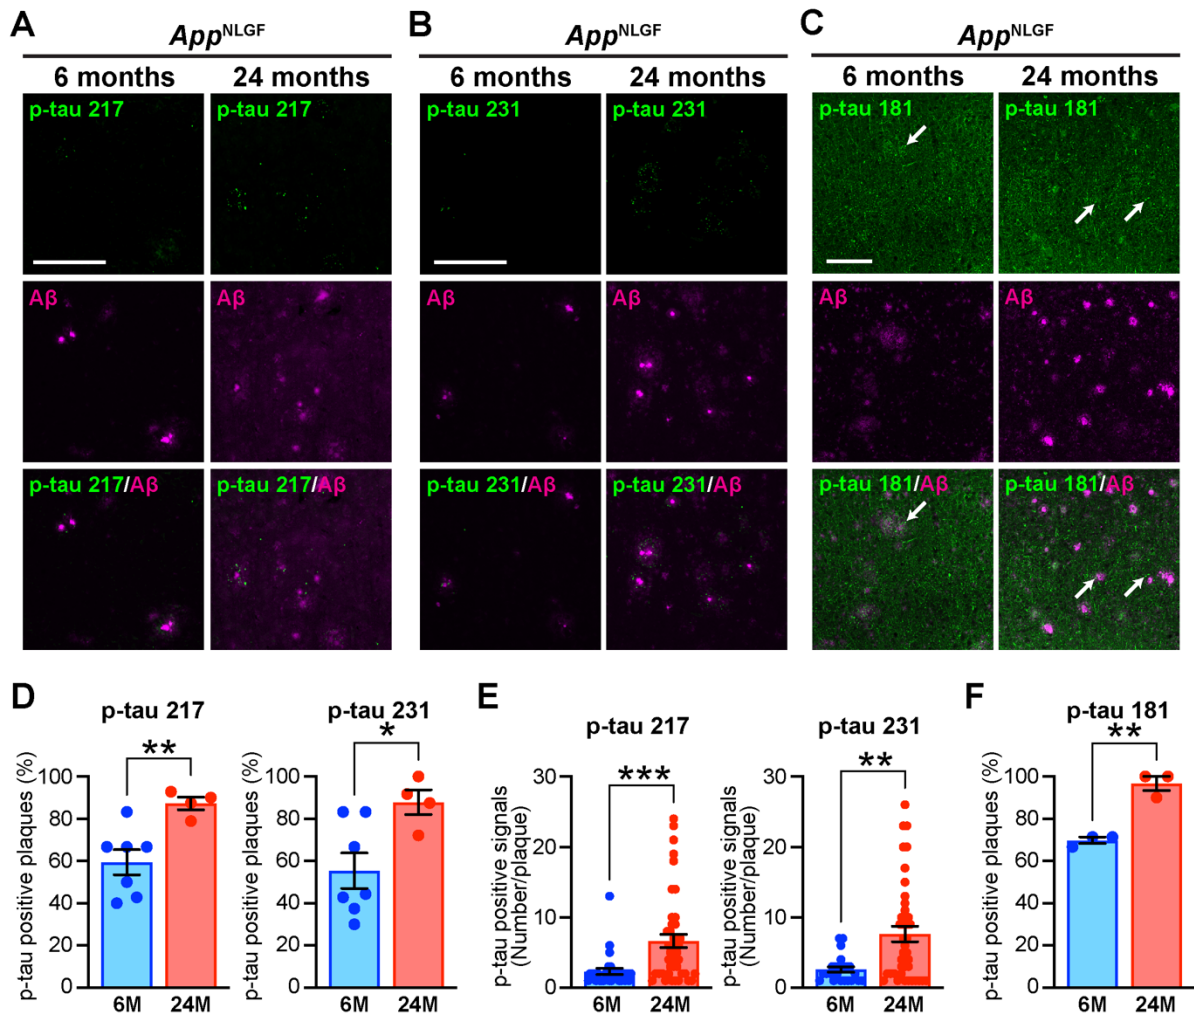

**Supplementary Figure 3. Age-associated increases in the number of p-tau 217 and 231 signals around Aβ plaques.**

Representative images of the cortices from brain sections of 6- and 24-month-old *App*<sup>NLGF</sup> mice immunostained with antibodies against (A) p-tau 217, (B) p-tau 231, and (C) p-tau 181 (each in green). Aβ plaques are detected by staining with FSB or Aβ antibody (in magenta). Scale bars, 100 μm. (D-F) Quantification analyses for the ratio of Aβ plaques with or without p-tau signals and the number of p-tau signals around Aβ plaques in both 6- and 24-month-old *App*<sup>NLGF</sup> mice. Mean ± SEM. n=4-7 sections (p-tau 217 and 231), n=3 sections (p-tau 181), \**p*<0.05, \*\**p*<0.01 and \*\*\**p*<0.001 vs. 6-month-old by unpaired Student's *t*-test.



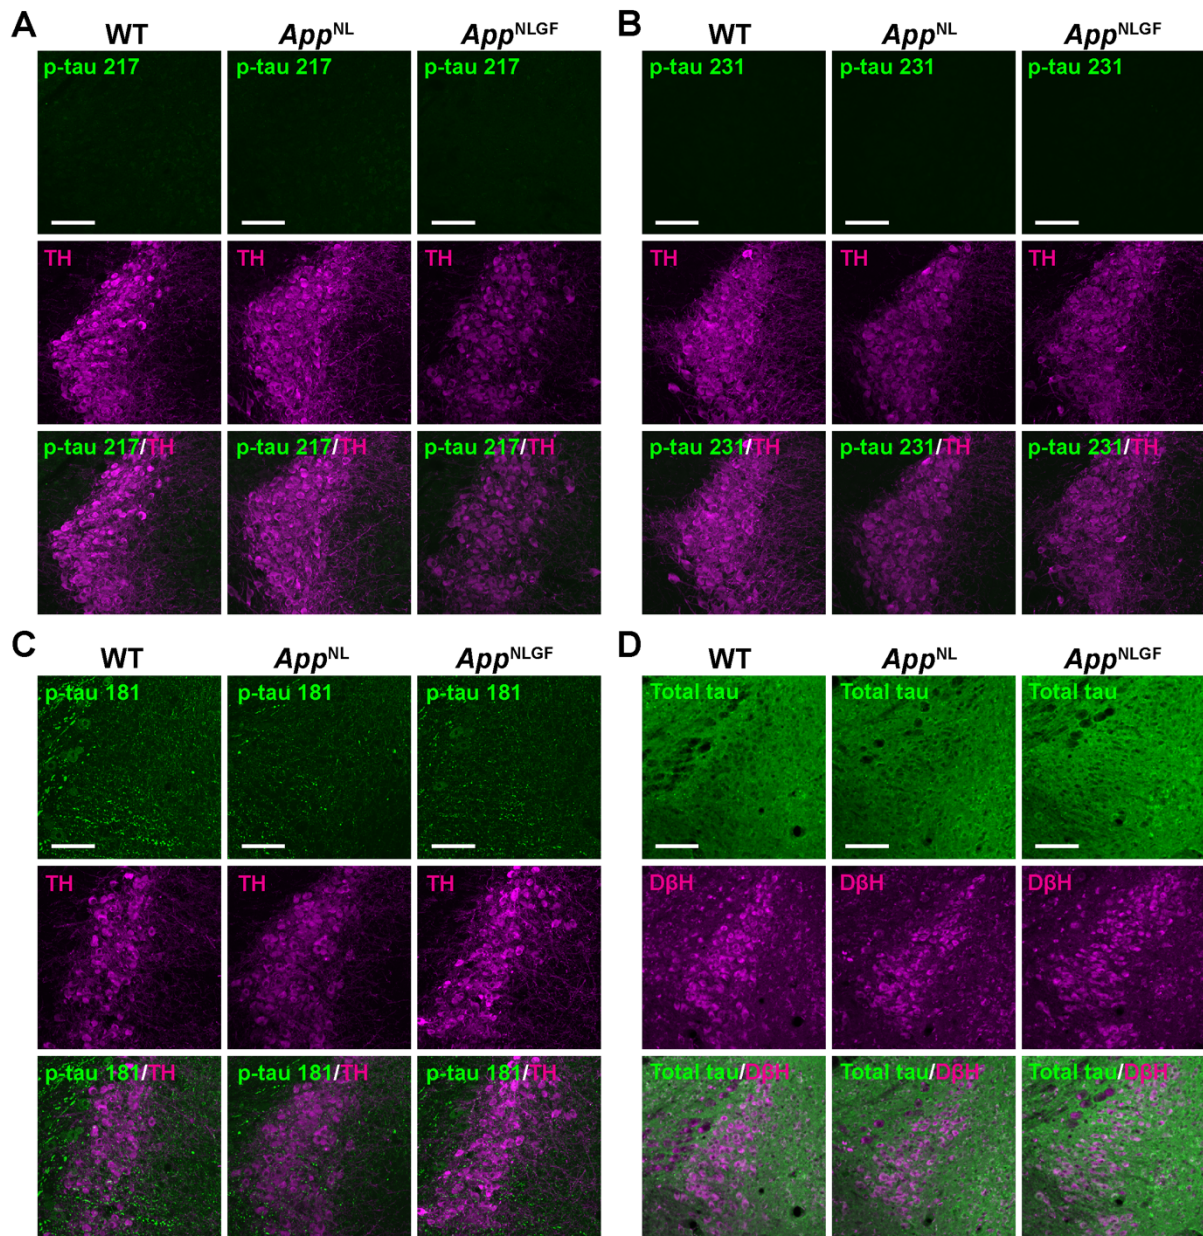

**Supplementary Figure 4. Absence of p-tau 217 and 231 from the LC of *App*<sup>NLGF</sup> mouse brain.**

Representative images of the locus coeruleus (LC) from frozen coronal brain sections immunostained with antibodies against (A) p-tau 217, (B) p-tau 231, (C) p-tau 181, and (D) total tau (each in green) and with antibodies against the noradrenergic neuronal markers, tyrosine hydroxylase (TH) and dopamine  $\beta$ -hydroxylase (D $\beta$ H) (each in magenta). Scale bars, 100  $\mu$ m.

**Supplementary Table 1. Antibodies used in this study.**

| REAGENT or RESOURCE                                                | SOURCE                  | IDENTIFIER      | RRID        | DILUTION |
|--------------------------------------------------------------------|-------------------------|-----------------|-------------|----------|
| <b><i>Primary antibodies</i></b>                                   |                         |                 |             |          |
| Mouse monoclonal anti-A $\beta$ -N [82E1]                          | IBL                     | 10323           | AB_10707424 | 1:200    |
| Rabbit polyclonal anti-A $\beta$ -N                                | IBL                     | 18584           | AB_10705431 | 1:200    |
| Mouse monoclonal anti-p-tau 202/205/208 [AT8]                      | Thermo Fisher           | MN1020          | AB_223647   | 1:500    |
| Rabbit monoclonal anti-p-tau 202/205 [AH36]                        | StressMarq              | SMC-601D        | AB_2820300  | 1:500    |
| Mouse monoclonal anti-p-tau 181 [AT270]                            | Thermo Fisher           | MN1050          | AB_223651   | 1:500    |
| Rabbit polyclonal anti-p-tau 217                                   | Thermo Fisher           | 44-744          | AB_2533741  | 1:500    |
| Mouse monoclonal anti-p-tau 231 [AT180]                            | Thermo Fisher           | MN1040          | AB_223649   | 1:500    |
| Rat monoclonal anti-tau [RTM38]                                    | Fujifilm Wako Chemicals | 017-26893       | N/A         | 1:300    |
| Rabbit monoclonal anti-Neurofilament-L [C28E10]                    | Cell Signaling          | 2837S           | AB_823575   | 1:300    |
| Rabbit polyclonal anti-MAP2                                        | Millipore               | AB5622          | AB_91939    | 1:200    |
| Rabbit polyclonal anti-Bassoon                                     | Synaptic Systems        | 141-002         | AB_887698   | 1:1000   |
| Guinea pig polyclonal anti-PSD95                                   | Frontier Institute      | PSD95-GP-Af660  | AB_2571539  | 1:300    |
| Mouse monoclonal anti-nonphospho-GSK3 $\beta$ (S9) [12B2]          | Millipore               | MABN2443        | AB_2832942  | 1:200    |
| Rabbit polyclonal anti-vesicular glutamate transporter 1 (VGLUT1)  | Synaptic Systems        | 135-303         | AB_887875   | 1:1000   |
| Rabbit polyclonal anti-vesicular GABA transporter (VGAT)           | Millipore               | AB5062P         | AB_2301998  | 1:500    |
| Rabbit polyclonal anti-vesicular acetylcholine transporter (VACHT) | Frontier Institute      | VACHT-Rb-Af1000 | AB_2571850  | 1:300    |
| Rabbit polyclonal anti-5-HT                                        | Immunostar              | 20080           | AB_572263   | 1:500    |
| Chicken polyclonal anti-tyrosine hydroxylase (TH)                  | Abcam                   | ab76442         | AB_1524535  | 1:1500   |
| Rabbit polyclonal anti-dopamine $\beta$ hydroxylase (D $\beta$ H)  | Immunostar              | 22806           | AB_572229   | 1:500    |
| Rabbit polyclonal anti-Iba1                                        | Fujifilm Wako Chemicals | 019-19741       | AB_839504   | 1:500    |
| Rat monoclonal anti-CD68 [FA-11]                                   | Bio-Rad Laboratories    | MCA1957         | AB_322219   | 1:200    |
| Rabbit polyclonal anti-P2Y12                                       | AnaSpec                 | 55043A          | AB_2298886  | 1:500    |
| Rat monoclonal anti-GFAP [2.2B10]                                  | Millipore               | 345860          | AB_2109651  | 1:1000   |
| Rabbit polyclonal anti-EAAT2                                       | Abcam                   | ab41621         | AB_941782   | 1:300    |
| Rabbit monoclonal anti-CNPase [D83E10]                             | Cell Signaling          | 5664S           | AB_10705455 | 1:100    |

| <b><i>Secondary antibodies</i></b>                                      |               |          |            |              |
|-------------------------------------------------------------------------|---------------|----------|------------|--------------|
| Goat polyclonal anti-Mouse IgG H&L Alexa Fluor 488                      | Abcam         | ab150117 | AB_2688012 | 1:500        |
| Goat polyclonal anti-Mouse IgG H&L Alexa Fluor 594                      | Abcam         | ab150120 | AB_2631447 | 1:500        |
| Goat polyclonal anti-Mouse IgG H&L Alexa Fluor 647                      | Abcam         | ab150119 | AB_2811129 | 1:500        |
| Goat polyclonal anti-Rabbit IgG H&L Alexa Fluor 488                     | Abcam         | ab150081 | AB_2734747 | 1:500        |
| Goat polyclonal anti-Rabbit IgG H&L Alexa Fluor 594                     | Abcam         | ab150084 | AB_2734147 | 1:500        |
| Goat polyclonal anti-Rabbit IgG H&L Alexa Fluor 647                     | Abcam         | ab150083 | AB_2714032 | 1:500        |
| Goat polyclonal anti-Rat IgG H&L Alexa Fluor 594                        | Abcam         | ab150168 | N/A        | 1:500        |
| Goat polyclonal anti-Rat IgG H&L Alexa Fluor 647                        | Abcam         | ab150167 | AB_2864291 | 1:500        |
| Goat polyclonal anti-Guinea Pig IgG H&L Alexa Fluor 594                 | Thermo Fisher | A-11076  | AB_2534120 | 1:500        |
| Goat polyclonal anti-Chicken IgY H&L Alexa Fluor 594                    | Abcam         | ab150176 | AB_2716250 | 1:500        |
| <b><i>Counterstain</i></b>                                              |               |          |            |              |
| DAPI (4',6-Diamidino-2-Phenylindole, Dihydrochloride)                   | Thermo Fisher | D1306    | AB_2629482 | 5.7 $\mu$ M  |
| FSB (1-Fluoro-2,5-bis(3-carboxy-4-hydroxystyryl)benzene, DMSO solution) | Dojindo       | F308     | N/A        | 23.8 $\mu$ M |
